# Supplementary material
Source: publisher site journal article supplement (https://www.dovepress.com/get_supplementary_file.php?f=346007.docx)
Supplement: Supplementary file 1 [file get_supplementary_file.php]

**Supplementary Table 1 Ingredient(and % kcal) composition of the standard chow**

|  | Gm% | Kcal% |
| --- | --- | --- |
| Protein | 19.2 | 20 |
| Carbohydrate | 67.3 | 70 |
| Fat | 4.3 | 10 |
|  |  | 100 |
| Total kcal/gm | 3.85 |  |
|  | | |
| **Ingredient** | **gm** | **kcal** |
| **Casein(30 Mesh)** | 200 | 800 |
| **L-Cystine** | 3 | 12 |
| **Corn Starch** | 506.2 | 2024 |
| **Maltodextrin 10** | 125 | 500 |
| **Sucrose** | 68.8 | 275 |
| **Cellulose, BW200** | 50 | 0 |
| **Soybean Oil** | 25 | 225 |
| **Lard*** | 20 | 180 |
| **Mineral Mix, S10026B** | 50 | 0 |
| **DiCalcium Phosphate** | 13 | 0 |
| **Calcium Carbonate** | 5.5 | 0 |
| **Potassium Citrate, 1 H2O** | 16.5 | 0 |
| **Vitamin Mix, V10001** | 10 | 40 |
| **Choline Bitartrate** | 2 | 0 |
| **FD&C Blue Dye** **#1 ＆ #5,** Alum. Lake 35-42％ | 0.01 ＆ 0.04 | 0 |
| **Total** | 1055.05 | 4057 |

**Supplementary Table 2 Ingredient(and % kcal) composition of high fat diet (HFD)**

|  | Gm% | Kcal% |
| --- | --- | --- |
| Protein | 26.2 | 20 |
| Carbohydrate | 26.3 | 20 |
| Fat | 34.9 | 60 |
|  |  | 100 |
| Total kcal/gm | 5.24 |  |
|  | | |
| **Ingredient** | **gm** | **kcal** |
| **Casein(30 Mesh)** | 200 | 800 |
| **L-Cystine** | 3 | 12 |
| **Corn Starch** | 0 | 0 |
| **Maltodextrin 10** | 125 | 500 |
| **Sucrose** | 68.8 | 275 |
| **Cellulose, BW200** | 50 | 0 |
| **Soybean Oil** | 25 | 225 |
| **Lard*** | 245 | 2205 |
| **Mineral Mix, S10026** | 10 | 0 |
| **DiCalcium Phosphate** | 13 | 0 |
| **Calcium Carbonate** | 5.5 | 0 |
| **Potassium Citrate, 1 H2O** | 16.5 | 0 |
| **Vitamin Mix, V10001** | 10 | 40 |
| **Choline Bitartrate** | 2 | 0 |
| **FD&C Blue Dye #1** | 0.05 | 0 |
| **Total** | 773.85 | 4057 |

**Supplementary Table 3 Exercise Preconditioning Scheme**

|  | Day1 | Day2 | Day3 | Day4 | Day5 | Day6 | Day7 |
| --- | --- | --- | --- | --- | --- | --- | --- |
| Speed（m/min） | 5 | 5 | 8 | 8 | 12 | 12 | 0 |
| Time（min） | 10 | 15 | 15 | 20 | 20 | 25 | 0 |
